# Supplementary material
Source: Springer Nature journal article supplement (https://www.springermedizin.de/resource/supplementary/13014_2010_355_MOESM1_ESM.pdf/9633602)

# Local Failure-Free Survival

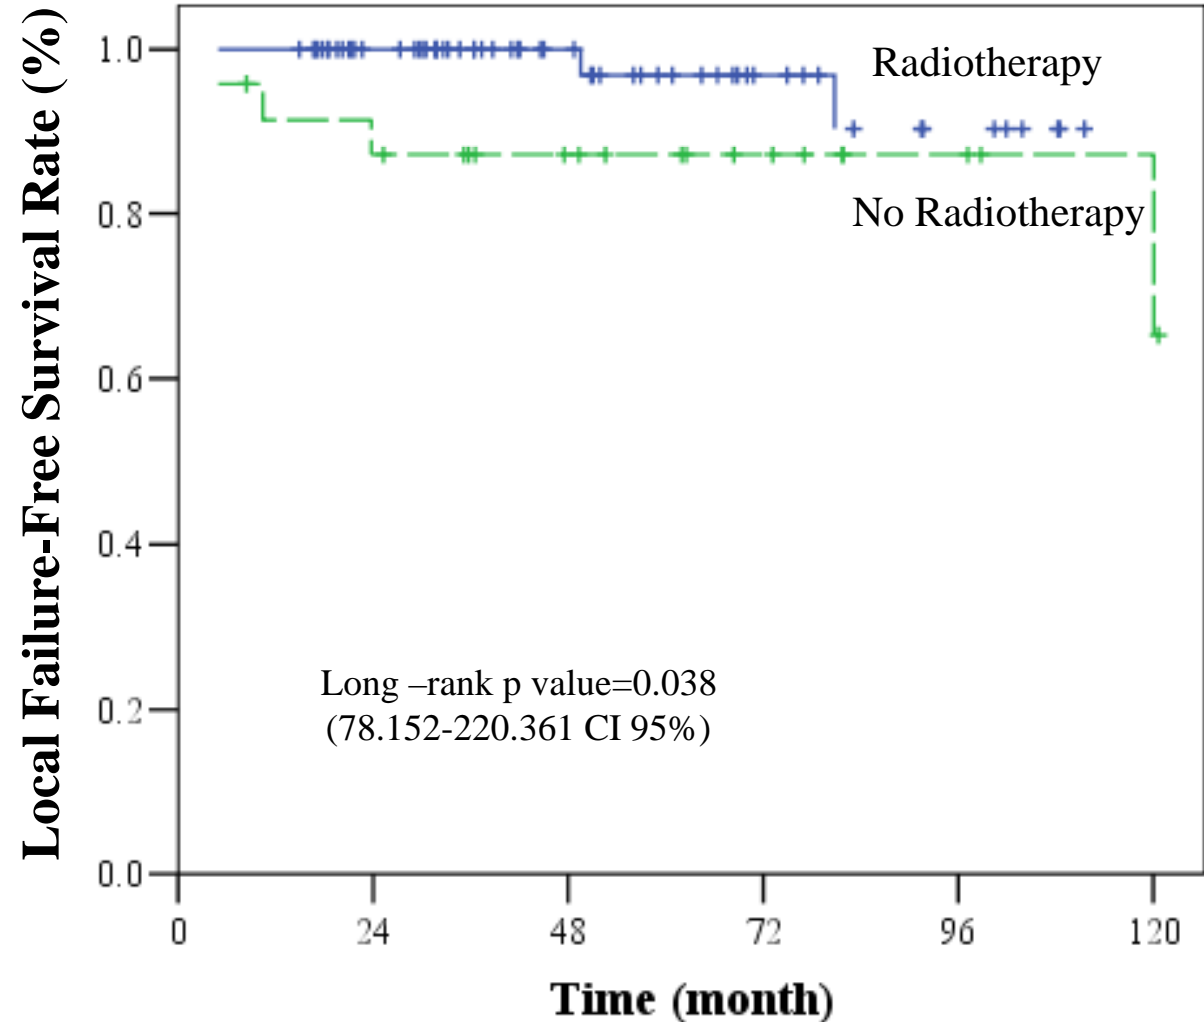

Supplement: MOESM1 [file 9633602]
